# Supplementary material for: Acquisition of Vimentin by trogocytosis inhibits the NK cell-mediated immune response against CTCs
Source: Research Square preprint supplement (doi:10.21203/rs.3.rs-7061678/v1), 2025-07-31
Supplement: Supplementary file 1 [file 95101feac167fb93777e4c26.docx]

Table 1. Primer sequences used in this study

| Primers for real-time PCR | |
| --- | --- |
| VIM-F | GACGCCATCAACACCGAGTT |
| VIM-R | CTTTGTCGTTGGTTAGCTGGT |
| β-actin-F | 5′-CGGGAAATCGTGCGTGAC-3′ |
| β-actin-R | 5′-CAGGCAGCTCGTAGCTCTT-3′ |
| Primers for deletion VIM mutants | |
| Del-H-F: | TTCAAGAACACCCGCACCAACGAGAAGGTGG |
| Del-H-R: | CTTGTACAGCTCGTCCATGCCGAGAGTG |
| Del-T-F: | TAAGGATCCACCGGATCTAGATAACTGATCATAATTCTACCGGG |
| Del-T-R: | AATCCTGCTCTCCTCGCCTTCCAGC |
| gRNA for CRISPR/Cas9 | |
| VIM | 5’- GGT TAG TGG AGT GAC TTT CGG GG-3’ |
| siRNAs | |
| ARHGEF6 | 5’-CTGGCTTACTGT GCAAAT CAT-3’ |
| ARHGEF7 | 5’-GACGCGAACTCCTCATCTGAAGGCT-3’ |
